# Supplementary material for: Five 8-hydroxyquinolinate-based coordination polymers with tunable structures and photoluminescent properties for sensing nitroaromatics
Source: Royal Society of Chemistry journal article supplement (doi:10.1039/c4dt02897j), 2014-10-14

## **Five 8-Hydroxyquinolate-Based Coordination Polymers with Tunable Structures and Photoluminescent Properties for Sensing Nitroaromatics**

*Liyan Zhang, Liying Sun, Xinyuan Li, Yulan Tian, and Guozan Yuan\**

School of Chemistry and Chemical Engineering, Anhui University of Technology, Maanshan,  
243002, China.

\* E-mail: yuanguozan@163.com

### **Table of Content**

1. Table S1-6 Crystal data, structure refinement, selected Bond lengths [ $\text{\AA}$ ] and angles [ $^\circ$ ] for **1-5**.
2. Fig. S1-3 Views of supramolecular structures of **1**.
3. Fig. S4-6 View of supramolecular structures of **2**.
4. Fig. S7-8 View of supramolecular structures of **3**.
5. Fig. S9 The 2D polymeric network of **4**.
6. Fig. S10 The space-filling mode of 3D network in **5**.
7. Fig. S11  $^1\text{H}$  and  $^{13}\text{C}$  NMR spectra of the ligand  $\text{L}_2\text{-MOM}$ .
8. Fig. S12 Fluorescence decay and fit curves of coordination polymers **1-5** in the solid state.
9. Fig. S13 Fluorescence quench response of **1** upon exposure to nitroaromatic vapour.
10. Fig. S14 Fluorescence quench response of **2** upon exposure to nitroaromatic vapour.
11. Fig. S15 Fluorescence quench response of **3** upon exposure to nitroaromatic vapour.
12. Fig. S16 Fluorescence quench response of **4** upon exposure to nitroaromatic vapour.
13. Fig. S17 Fluorescence quench response of **5** upon exposure to nitroaromatic vapour.

1.1. Table S1. Crystal data and structure refinement for complexes **1-5**.

| Complex                                                                              | <b>1</b>                                                                        | <b>2</b>                                                         | <b>3</b>                                                         | <b>4</b>                                                         | <b>5</b>                                                                      |
|--------------------------------------------------------------------------------------|---------------------------------------------------------------------------------|------------------------------------------------------------------|------------------------------------------------------------------|------------------------------------------------------------------|-------------------------------------------------------------------------------|
| formula                                                                              | C <sub>120</sub> H <sub>84</sub> N <sub>18</sub> O <sub>6</sub> Zn <sub>3</sub> | C <sub>42</sub> H <sub>36</sub> N <sub>6</sub> O <sub>4</sub> Zn | C <sub>40</sub> H <sub>28</sub> N <sub>6</sub> O <sub>2</sub> Zn | C <sub>40</sub> H <sub>28</sub> N <sub>6</sub> O <sub>2</sub> Cd | C <sub>60</sub> H <sub>42</sub> Cd <sub>2</sub> N <sub>9</sub> O <sub>3</sub> |
| fw                                                                                   | 2070.224                                                                        | 754.16                                                           | 690.05                                                           | 737.08                                                           | 1161.82                                                                       |
| Temperature (K)                                                                      | 173(2)                                                                          | 173(2)                                                           | 141(2)                                                           | 296(2) K                                                         | 296(2) K                                                                      |
| cryst syst                                                                           | monoclinic                                                                      | monoclinic                                                       | orthorhombic                                                     | orthorhombic                                                     | rhombohedral                                                                  |
| space group                                                                          | <i>P</i> 2 <sub>1</sub> / <i>n</i>                                              | <i>P</i> 2 <sub>1</sub> / <i>c</i>                               | <i>P</i> bca                                                     | <i>P</i> bca                                                     | <i>R</i> -3                                                                   |
| <i>a</i> (Å)                                                                         | 14.440(3)                                                                       | 12.9164(17)                                                      | 9.168(3)                                                         | 9.0309(8)                                                        | 30.7574(16)                                                                   |
| <i>b</i> (Å)                                                                         | 23.641(4)                                                                       | 10.2951(14)                                                      | 17.701(7)                                                        | 17.7660(15)                                                      | 30.7574(16)                                                                   |
| <i>c</i> (Å)                                                                         | 15.858(3)                                                                       | 14.240(2)                                                        | 19.845(8)                                                        | 20.1395(18)                                                      | 12.1006(12)                                                                   |
| $\alpha$ (deg)                                                                       | 90                                                                              | 90                                                               | 90                                                               | 90                                                               | 90                                                                            |
| $\beta$ (deg)                                                                        | 109.184(5)                                                                      | 113.820(3)                                                       | 90                                                               | 90                                                               | 90                                                                            |
| $\gamma$ (deg)                                                                       | 90                                                                              | 90                                                               | 90                                                               | 90                                                               | 120                                                                           |
| <i>V</i> (Å <sup>3</sup> )                                                           | 5113.2                                                                          | 1732.3(4)                                                        | 3220(2)                                                          | 3231.0(5)                                                        | 9913.7(12)                                                                    |
| <i>Z</i>                                                                             | 2                                                                               | 2                                                                | 4                                                                | 4                                                                | 6                                                                             |
| <i>D<sub>c</sub></i> (g cm <sup>-3</sup> )                                           | 1.345                                                                           | 1.344                                                            | 1.423                                                            | 1.515                                                            | 1.168                                                                         |
| <i>F</i> (000)                                                                       | 2136                                                                            | 725                                                              | 1424                                                             | 1496                                                             | 3822                                                                          |
| $\mu$ (mm <sup>-1</sup> )                                                            | 0.765                                                                           | 0.755                                                            | 0.810                                                            | 0.723                                                            | 0.700                                                                         |
| reflns/unique                                                                        | 20936/8952                                                                      | 9981/3948                                                        | 13398/3639                                                       | 15611/2837                                                       | 20753/5015                                                                    |
| <i>R</i> <sub>int</sub>                                                              | 0.0753                                                                          | 0.0290                                                           | 0.0382                                                           | 0.0459                                                           | 0.0284                                                                        |
| data/restraints/<br>params                                                           | 8952/18/689                                                                     | 3948/0/244                                                       | 3639/0/224                                                       | 2837/0/224                                                       | 5015/0/262                                                                    |
| GOF on <i>F</i> <sup>2</sup>                                                         | 0.947                                                                           | 1.095                                                            | 1.033                                                            | 1.073                                                            | 1.051                                                                         |
| <i>R</i> <sub>1</sub> , <i>wR</i> <sub>2</sub> ( <i>I</i> > 2 $\sigma$ ( <i>I</i> )) | 0.0680,<br>0.1643                                                               | 0.0407,<br>0.0948                                                | 0.0363,<br>0.1052                                                | 0.0821,<br>0.2069                                                | 0.0278,<br>0.0815                                                             |
| <i>R</i> <sub>1</sub> , <i>wR</i> <sub>2</sub> (all data)                            | 0.1340,<br>0.1942                                                               | 0.0521,<br>0.1001                                                | 0.0619,<br>0.1215                                                | 0.1045,<br>0.2338                                                | 0.0354,<br>0.0854                                                             |
| largest diff. peak<br>and hole (e Å <sup>-3</sup> )                                  | 0.738,<br>-0.369                                                                | 0.502,<br>-0.424                                                 | 0.307,<br>-0.274                                                 | 0.608,<br>-3.882                                                 | 0.872,<br>-0.312                                                              |

1.2. Table S2 Selected Bond lengths [ $\text{\AA}$ ] and angles [ $^\circ$ ] for **1**.

---

|                     |            |
|---------------------|------------|
| Zn(1)-O(1)#1        | 2.033(3)   |
| Zn(1)-O(1)          | 2.033(3)   |
| Zn(1)-N(1)          | 2.221(4)   |
| Zn(1)-N(1)#1        | 2.221(4)   |
| Zn(1)-N(9)#2        | 2.246(4)   |
| Zn(1)-N(9)#3        | 2.246(4)   |
| Zn(2)-O(2)          | 1.931(3)   |
| Zn(2)-O(3)          | 1.961(4)   |
| Zn(2)-N(2)          | 2.087(5)   |
| Zn(2)-N(7)          | 2.167(4)   |
| Zn(2)-N(4)          | 2.261(5)   |
|                     |            |
| O(1)#1-Zn(1)-O(1)   | 180.00(8)  |
| O(1)#1-Zn(1)-N(1)   | 101.99(15) |
| O(1)-Zn(1)-N(1)     | 78.01(15)  |
| O(1)#1-Zn(1)-N(1)#1 | 78.00(15)  |
| O(1)-Zn(1)-N(1)#1   | 102.00(15) |
| N(1)-Zn(1)-N(1)#1   | 180.0      |
| O(1)#1-Zn(1)-N(9)#2 | 91.65(14)  |
| O(1)-Zn(1)-N(9)#2   | 88.35(14)  |
| N(1)-Zn(1)-N(9)#2   | 86.57(15)  |
| N(1)#1-Zn(1)-N(9)#2 | 93.43(15)  |
| O(1)#1-Zn(1)-N(9)#3 | 88.35(14)  |
| O(1)-Zn(1)-N(9)#3   | 91.65(14)  |
| N(1)-Zn(1)-N(9)#3   | 93.43(15)  |
| N(1)#1-Zn(1)-N(9)#3 | 86.57(15)  |
| N(9)#2-Zn(1)-N(9)#3 | 179.999(1) |
| O(2)-Zn(2)-O(3)     | 137.21(17) |
| O(2)-Zn(2)-N(2)     | 116.16(19) |
| O(3)-Zn(2)-N(2)     | 106.61(18) |
| O(2)-Zn(2)-N(7)     | 97.81(15)  |
| O(3)-Zn(2)-N(7)     | 80.03(16)  |
| N(2)-Zn(2)-N(7)     | 93.83(19)  |
| O(2)-Zn(2)-N(4)     | 78.66(16)  |
| O(3)-Zn(2)-N(4)     | 98.76(16)  |
| N(2)-Zn(2)-N(4)     | 92.7(2)    |
| N(7)-Zn(2)-N(4)     | 173.47(19) |
| C(8)-O(1)-Zn(1)     | 115.2(3)   |
| C(28)-O(2)-Zn(2)    | 119.1(3)   |
| C(48)-O(3)-Zn(2)    | 116.5(3)   |
| C(1)-N(1)-Zn(1)     | 132.3(4)   |

|                    |          |
|--------------------|----------|
| C(9)-N(1)-Zn(1)    | 108.7(3) |
| C(15)-N(2)-Zn(2)   | 127.3(4) |
| C(11)-N(2)-Zn(2)   | 115.8(4) |
| C(21)-N(4)-Zn(2)   | 134.4(5) |
| C(29)-N(4)-Zn(2)   | 107.5(3) |
| C(41)-N(7)-Zn(2)   | 130.9(4) |
| C(49)-N(7)-Zn(2)   | 109.1(3) |
| C(56)-N(9)-Zn(1)#4 | 122.7(3) |
| C(60)-N(9)-Zn(1)#4 | 121.4(3) |

---

Symmetry transformations used to generate equivalent atoms:

#1 -x, -y+1, -z+1    #2 x-1, y, z    #3 -x+1, -y+1, -z+1  
 #4 x+1, y, z    #5 -x+2, -y, -z+2

### 1.3. Table S3 Selected Bond lengths [Å] and angles [°] for **2**.

---

|                     |            |
|---------------------|------------|
| Zn(1)-O(1)          | 2.0199(18) |
| Zn(1)-O(1)#1        | 2.0200(18) |
| Zn(1)-N(3)#2        | 2.222(2)   |
| Zn(1)-N(3)#3        | 2.222(2)   |
| Zn(1)-N(1)#1        | 2.243(2)   |
| Zn(1)-N(1)          | 2.243(2)   |
| O(1)-Zn(1)-O(1)#1   | 180.00(9)  |
| O(1)-Zn(1)-N(3)#2   | 89.86(8)   |
| O(1)#1-Zn(1)-N(3)#2 | 90.14(8)   |
| O(1)-Zn(1)-N(3)#3   | 90.14(8)   |
| O(1)#1-Zn(1)-N(3)#3 | 89.86(8)   |
| N(3)#2-Zn(1)-N(3)#3 | 180.0      |
| O(1)-Zn(1)-N(1)#1   | 101.73(8)  |
| O(1)#1-Zn(1)-N(1)#1 | 78.27(8)   |
| N(3)#2-Zn(1)-N(1)#1 | 92.92(9)   |
| N(3)#3-Zn(1)-N(1)#1 | 87.08(9)   |
| O(1)-Zn(1)-N(1)     | 78.27(8)   |
| O(1)#1-Zn(1)-N(1)   | 101.73(8)  |
| N(3)#2-Zn(1)-N(1)   | 87.08(9)   |
| N(3)#3-Zn(1)-N(1)   | 92.92(9)   |
| N(1)#1-Zn(1)-N(1)   | 180.00(8)  |
| C(7)-O(1)-Zn(1)     | 116.17(16) |
| C(2)-N(1)-Zn(1)     | 131.8(2)   |
| C(6)-N(1)-Zn(1)     | 108.08(16) |
| C(19)-N(3)-Zn(1)#4  | 118.69(19) |
| C(18)-N(3)-Zn(1)#4  | 124.59(18) |

---

Symmetry transformations used to generate equivalent atoms:

#1  $-x+1, -y+1, -z$     #2  $-x+1, y-1/2, -z-1/2$   
#3  $x, -y+3/2, z+1/2$     #4  $-x+1, y+1/2, -z-1/2$

1.4. Table S4 Selected Bond lengths [ $\text{\AA}$ ] and angles [ $^\circ$ ] for **3**.

---

|                     |            |
|---------------------|------------|
| Zn(1)-O(1)#1        | 2.0001(14) |
| Zn(1)-O(1)          | 2.0002(14) |
| Zn(1)-N(1)          | 2.2438(18) |
| Zn(1)-N(1)#1        | 2.2438(18) |
| Zn(1)-N(3)#2        | 2.297(2)   |
| Zn(1)-N(3)#3        | 2.297(2)   |
| N(3)-Zn(1)#4        | 2.297(2)   |
|                     |            |
| O(1)#1-Zn(1)-O(1)   | 180.0      |
| O(1)#1-Zn(1)-N(1)   | 101.31(6)  |
| O(1)-Zn(1)-N(1)     | 78.69(6)   |
| O(1)#1-Zn(1)-N(1)#1 | 78.69(6)   |
| O(1)-Zn(1)-N(1)#1   | 101.31(6)  |
| N(1)-Zn(1)-N(1)#1   | 180.0      |
| O(1)#1-Zn(1)-N(3)#2 | 89.47(7)   |
| O(1)-Zn(1)-N(3)#2   | 90.53(7)   |
| N(1)-Zn(1)-N(3)#2   | 87.00(7)   |
| N(1)#1-Zn(1)-N(3)#2 | 93.00(7)   |
| O(1)#1-Zn(1)-N(3)#3 | 90.53(7)   |
| O(1)-Zn(1)-N(3)#3   | 89.47(7)   |
| N(1)-Zn(1)-N(3)#3   | 93.00(7)   |
| N(1)#1-Zn(1)-N(3)#3 | 87.00(7)   |
| N(3)#2-Zn(1)-N(3)#3 | 180.00(6)  |
| C(7)-O(1)-Zn(1)     | 117.16(13) |
| C(2)-N(1)-Zn(1)     | 132.13(15) |
| C(6)-N(1)-Zn(1)     | 108.38(13) |
| C(19)-N(3)-Zn(1)#4  | 122.85(15) |
| C(20)-N(3)-Zn(1)#4  | 120.05(15) |

---

Symmetry transformations used to generate equivalent atoms:

#1  $-x+1, -y, -z+1$     #2  $-x+1/2, y-1/2, z$   
#3  $x+1/2, -y+1/2, -z+1$     #4  $x-1/2, -y+1/2, -z+1$

1.5. Table S5 Selected Bond lengths [ $\text{\AA}$ ] and angles [ $^\circ$ ] for **4**.

---

|              |          |
|--------------|----------|
| Cd(1)-O(1)   | 2.058(3) |
| Cd(1)-O(1)#1 | 2.058(3) |
| Cd(1)-N(1)#1 | 2.275(4) |

|                     |            |
|---------------------|------------|
| Cd(1)-N(1)          | 2.275(4)   |
| Cd(1)-N(3)#2        | 2.335(4)   |
| Cd(1)-N(3)#3        | 2.335(4)   |
| O(1)-Cd(1)-O(1)#1   | 179.998(1) |
| O(1)-Cd(1)-N(1)#1   | 102.98(13) |
| O(1)#1-Cd(1)-N(1)#1 | 77.02(13)  |
| O(1)-Cd(1)-N(1)     | 77.02(13)  |
| O(1)#1-Cd(1)-N(1)   | 102.98(13) |
| N(1)#1-Cd(1)-N(1)   | 179.999(1) |
| O(1)-Cd(1)-N(3)#2   | 90.45(13)  |
| O(1)#1-Cd(1)-N(3)#2 | 89.55(13)  |
| N(1)#1-Cd(1)-N(3)#2 | 93.49(14)  |
| N(1)-Cd(1)-N(3)#2   | 86.51(14)  |
| O(1)-Cd(1)-N(3)#3   | 89.55(13)  |
| O(1)#1-Cd(1)-N(3)#3 | 90.45(13)  |
| N(1)#1-Cd(1)-N(3)#3 | 86.50(14)  |
| N(1)-Cd(1)-N(3)#3   | 93.49(14)  |
| N(3)#2-Cd(1)-N(3)#3 | 179.999(1) |
| C(7)-O(1)-Cd(1)     | 117.2(3)   |
| C(2)-N(1)-Cd(1)     | 131.0(3)   |
| C(6)-N(1)-Cd(1)     | 109.6(3)   |
| C(19)-N(3)-Cd(1)#4  | 123.9(3)   |
| C(20)-N(3)-Cd(1)#4  | 119.0(3)   |

---

Symmetry transformations used to generate equivalent atoms:

#1  $-x+1, -y, -z+1$     #2  $-x+1/2, y-1/2, z$

#3  $x+1/2, -y+1/2, -z+1$     #4  $x-1/2, -y+1/2, -z+1$

1.6. Table S6 Selected Bond lengths [Å] and angles [°] for **5**.

---

|              |          |
|--------------|----------|
| Cd(1)-O(1)#1 | 2.211(3) |
| Cd(1)-O(1)   | 2.211(3) |
| Cd(1)-N(3)#2 | 2.374(4) |
| Cd(1)-N(3)#3 | 2.374(4) |
| Cd(1)-N(1)   | 2.380(4) |
| Cd(1)-N(1)#1 | 2.380(4) |
| Cd(2)-N(2)#5 | 2.383(3) |
| Cd(2)-N(2)#6 | 2.383(3) |
| Cd(2)-N(2)   | 2.383(3) |
| Cd(2)-N(2)#7 | 2.383(3) |
| Cd(2)-N(2)#8 | 2.383(3) |
| N(3)-Cd(1)#9 | 2.374(4) |

|                     |            |
|---------------------|------------|
| O(1)#1-Cd(1)-O(1)   | 180.0      |
| O(1)#1-Cd(1)-N(3)#2 | 88.09(14)  |
| O(1)-Cd(1)-N(3)#2   | 91.91(14)  |
| O(1)#1-Cd(1)-N(3)#3 | 91.90(14)  |
| O(1)-Cd(1)-N(3)#3   | 88.10(14)  |
| N(3)#2-Cd(1)-N(3)#3 | 180.0      |
| O(1)#1-Cd(1)-N(1)   | 107.55(11) |
| O(1)-Cd(1)-N(1)     | 72.46(11)  |
| N(3)#2-Cd(1)-N(1)   | 91.75(15)  |
| N(3)#3-Cd(1)-N(1)   | 88.25(15)  |
| O(1)#1-Cd(1)-N(1)#1 | 72.45(11)  |
| O(1)-Cd(1)-N(1)#1   | 107.55(11) |
| N(3)#2-Cd(1)-N(1)#1 | 88.25(15)  |
| N(3)#3-Cd(1)-N(1)#1 | 91.75(15)  |
| N(1)-Cd(1)-N(1)#1   | 180.0      |
| C(7)-O(1)-Cd(1)     | 116.1(2)   |
| C(2)-N(1)-Cd(1)     | 128.1(3)   |
| C(6)-N(1)-Cd(1)     | 110.8(3)   |
| N(2)#4-Cd(2)-N(2)#5 | 180.0      |
| N(2)#4-Cd(2)-N(2)#6 | 93.93(12)  |
| N(2)#5-Cd(2)-N(2)#6 | 86.07(12)  |
| N(2)#4-Cd(2)-N(2)   | 86.07(12)  |
| N(2)#5-Cd(2)-N(2)   | 93.93(12)  |
| N(2)#6-Cd(2)-N(2)   | 86.08(12)  |
| N(2)#4-Cd(2)-N(2)#7 | 93.93(12)  |
| N(2)#5-Cd(2)-N(2)#7 | 86.07(12)  |
| N(2)#6-Cd(2)-N(2)#7 | 93.92(12)  |
| N(2)-Cd(2)-N(2)#7   | 180.0      |
| N(2)#4-Cd(2)-N(2)#8 | 86.07(12)  |
| N(2)#5-Cd(2)-N(2)#8 | 93.93(12)  |
| N(2)#6-Cd(2)-N(2)#8 | 180.0      |
| N(2)-Cd(2)-N(2)#8   | 93.93(12)  |
| N(2)#7-Cd(2)-N(2)#8 | 86.07(12)  |
| C(14)-N(2)-Cd(2)    | 125.6(3)   |
| C(13)-N(2)-Cd(2)    | 118.1(3)   |
| C(19)-N(3)-Cd(1)#9  | 124.9(4)   |
| C(18)-N(3)-Cd(1)#9  | 118.6(4)   |

---

Symmetry transformations used to generate equivalent atoms:

#1  $-x-1/3, -y+1/3, -z+1/3$     #2  $-y-1/3, x-y+1/3, z-2/3$

#3  $y, -x+y, -z+1$     #4  $y, -x+y, -z$     #5  $-y, x-y, z$

#6  $x-y, x, -z$     #7  $-x, -y, -z$     #8  $-x+y, -x, z$

#9  $-x+y-2/3, -x-1/3, z+2/3$

2.1. **Fig. S1** The coordination geometries of Zn1 and Zn2 in **1**

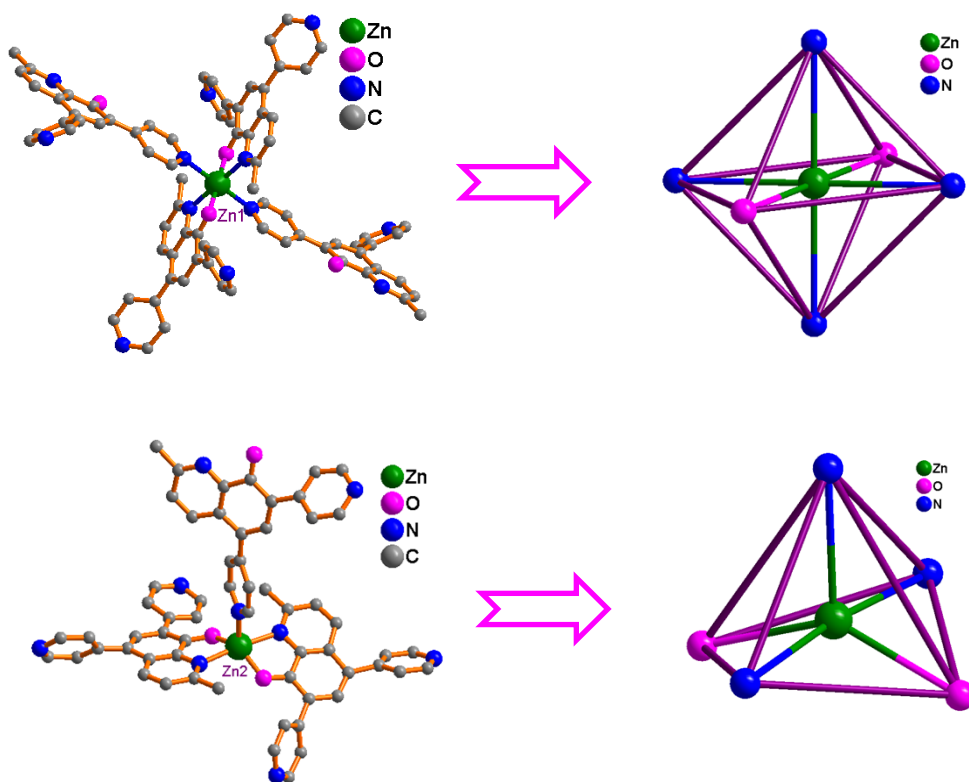

2.2. **Fig. S2** The space-filling mode of 1D infinite chain in **1** along the *a*-axis

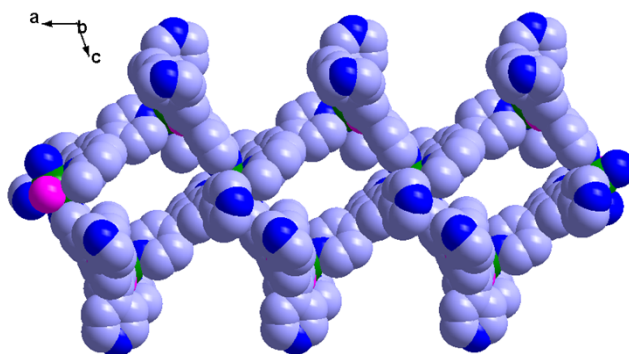

2.3. **Fig. S3** Schematic view showing 3-fold interpenetration in complex **1**.

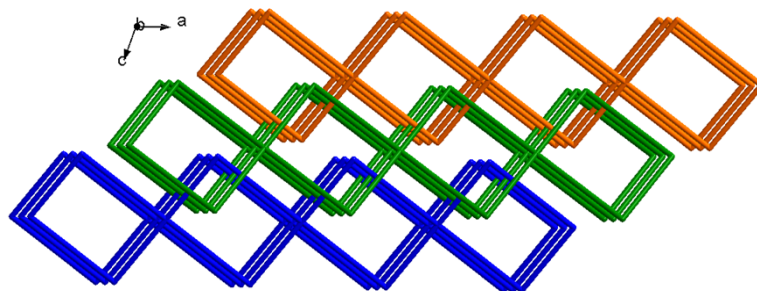



3.1. **Fig. S4** The adjacent layers are connected via nonclassical C-H $\cdots$ N hydrogen bonds in **2**.

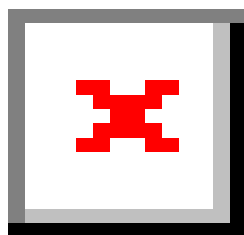

3.2. **Fig. S5** The space-filling mode of 3D network in **2**.

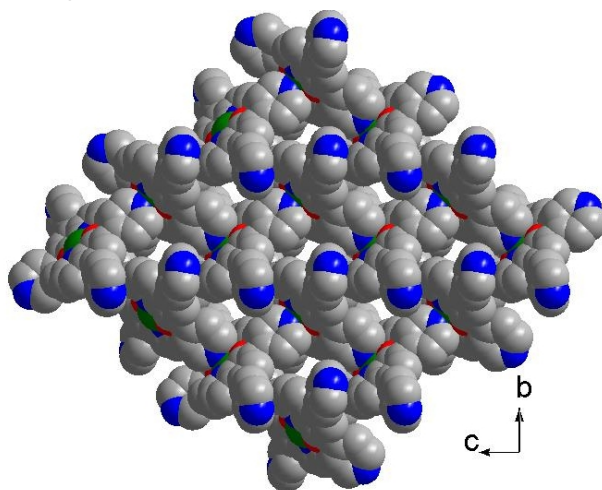

3.3. **Fig. S6** 2D layer structure of **2** containing *meso*-helical chains ( $P+M$ ).

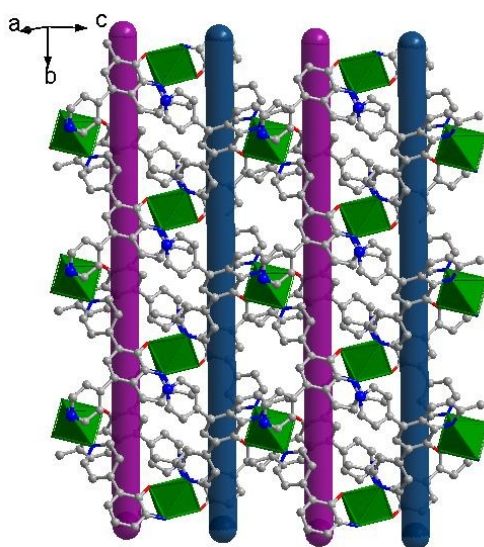

4.1. **Fig. S7** View of the coordination geometries of Zn(II) atoms in **3**.

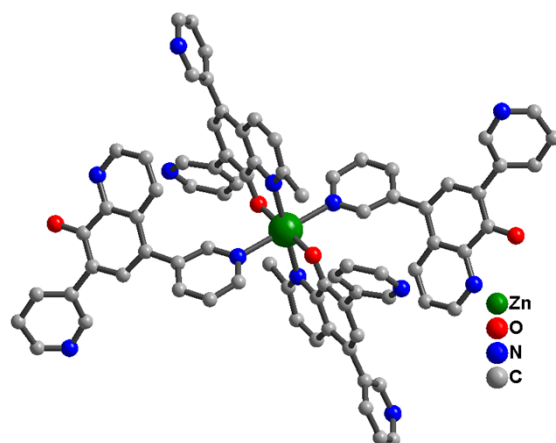

4.2. **Fig. S8** The 2D polymeric network of **3**.

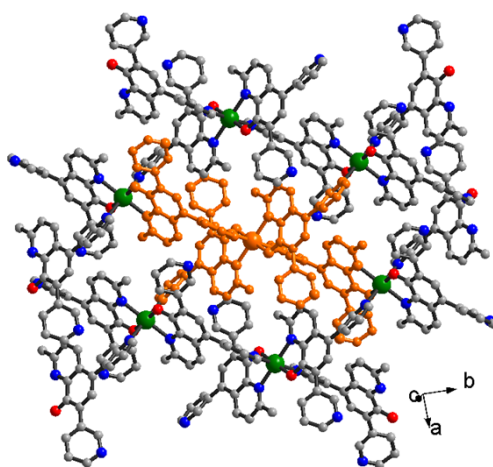

5. **Fig. S9** The 2D polymeric network of **4**.

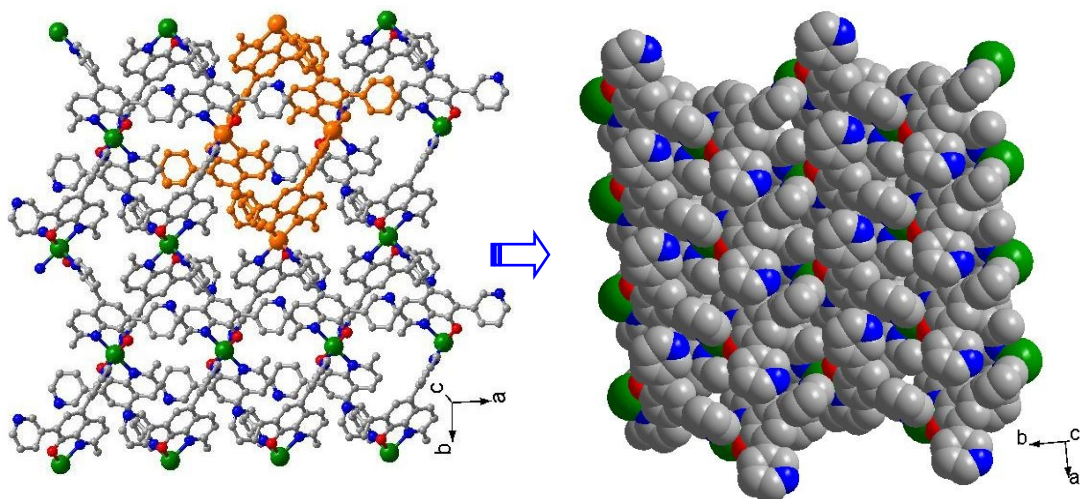

6. Fig. S10 The space-filling mode of 3D network in 5.

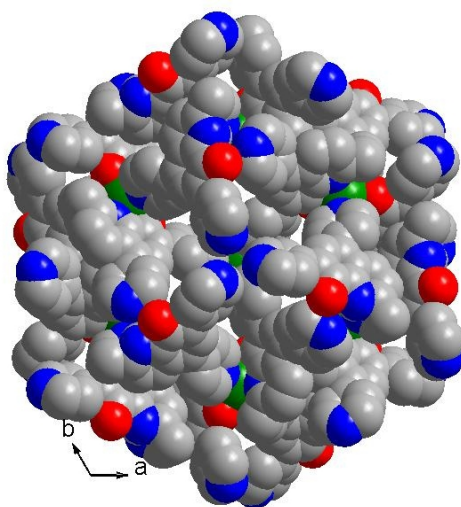

7. Fig. S11  $^1\text{H}$  and  $^{13}\text{C}$  NMR spectra of the ligand  $\text{L}_2\text{-MOM}$ .

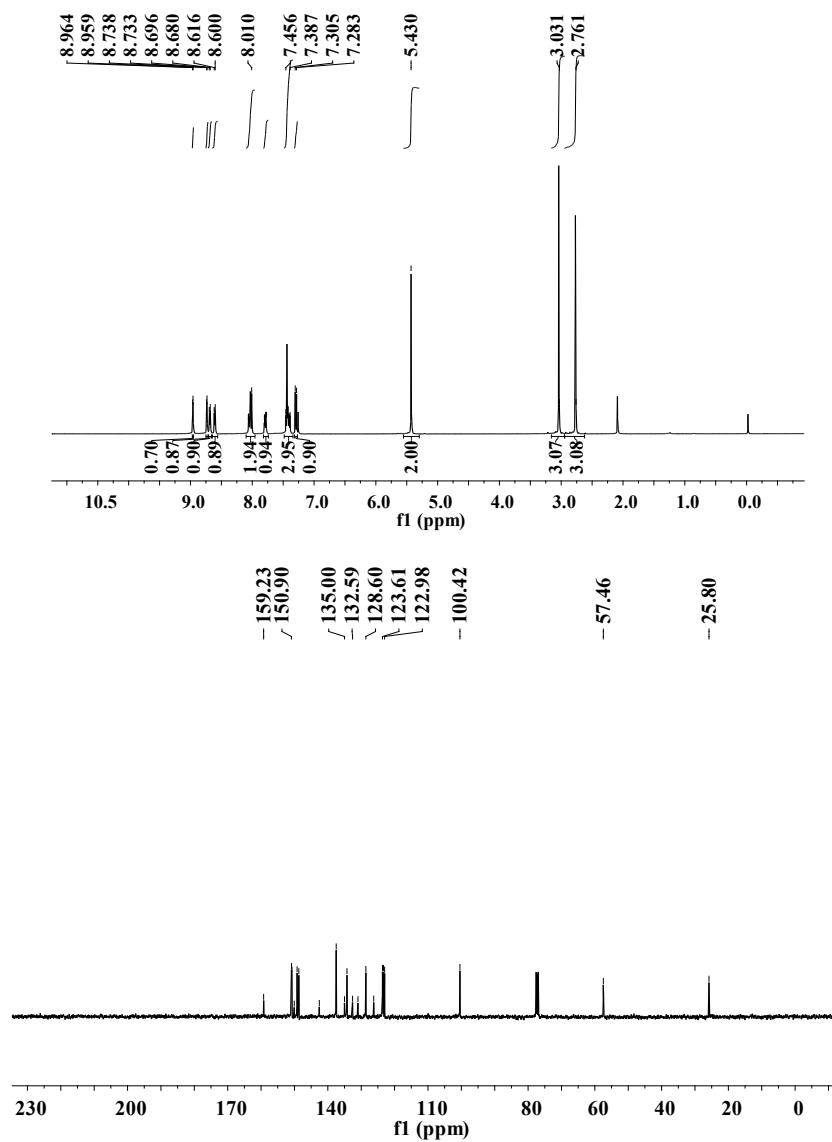

8. **Fig. S12** Fluorescence decay curves of coordination polymers **1-5** in the solid state.

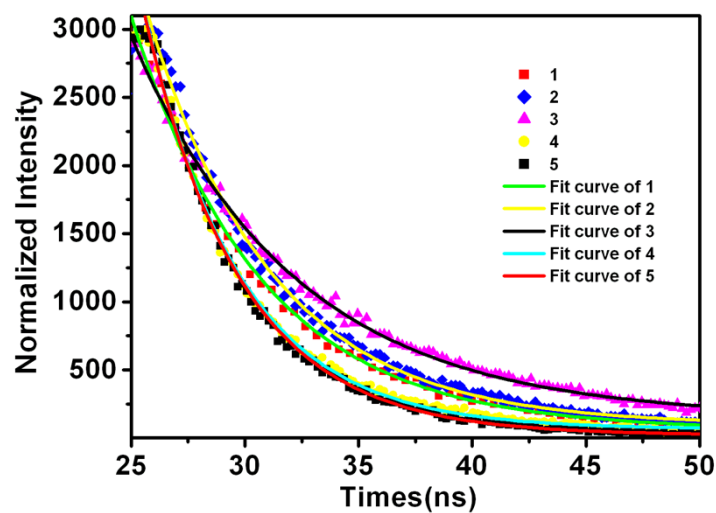

9. **Fig. S13** Fluorescence quench response of **1** upon exposure to NB (a), 2-NT (b) and 3-NT (c) vapour at the specified exposure times.

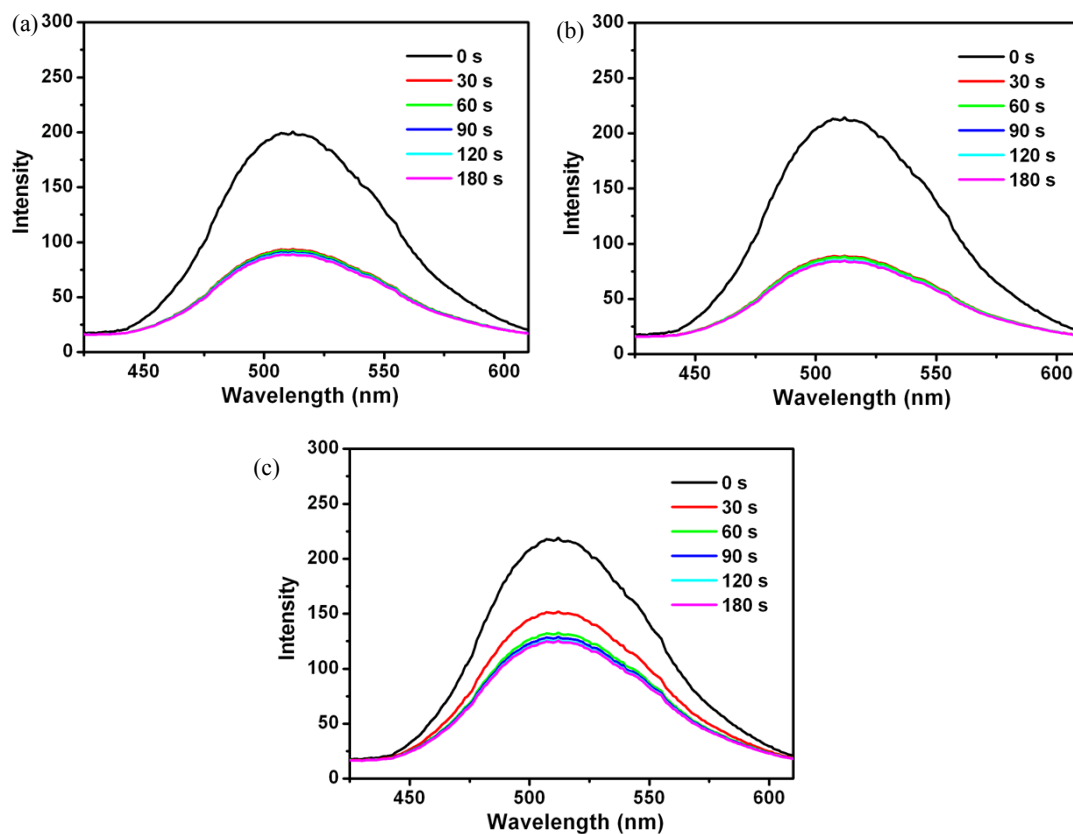

10. **Fig. S14** Fluorescence quench response of **2** upon exposure to NB (a), 2-NT (b) and 3-NT (c) vapour at the specified exposure times.

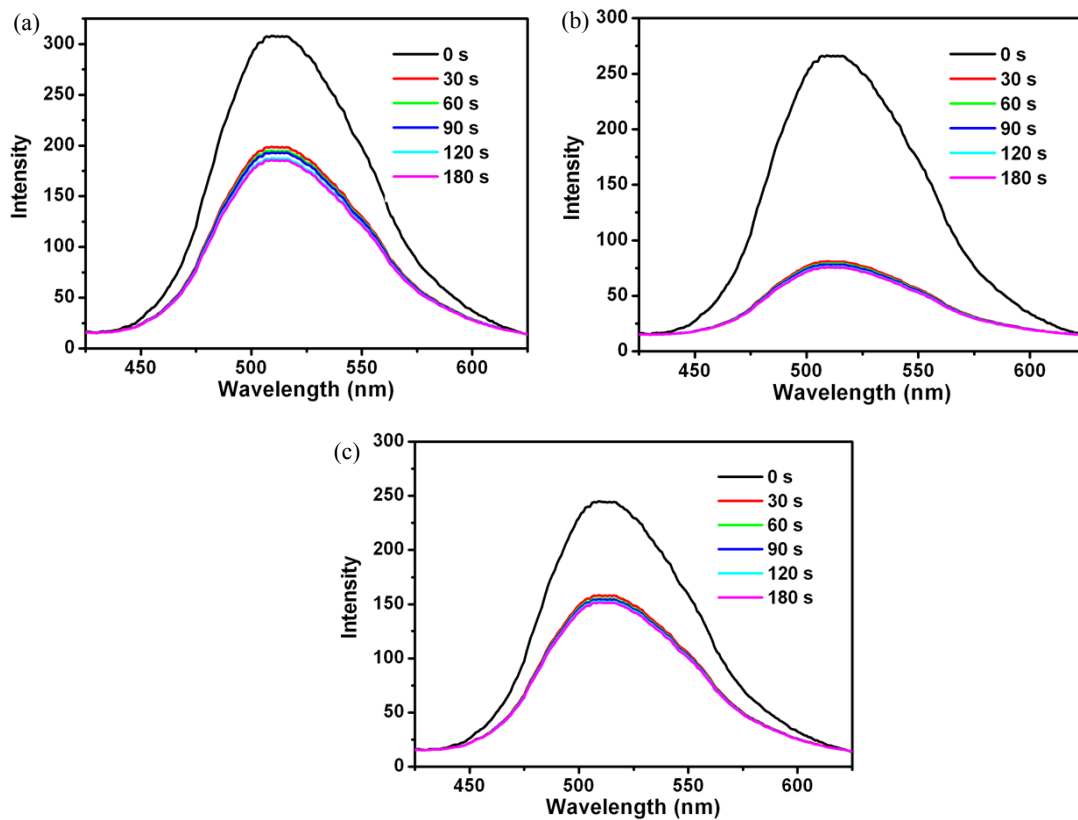

11. **Fig. S15** Fluorescence quench response of **3** upon exposure to NB (a), 2-NT (b) and 3-NT (c) vapour at the specified exposure times.

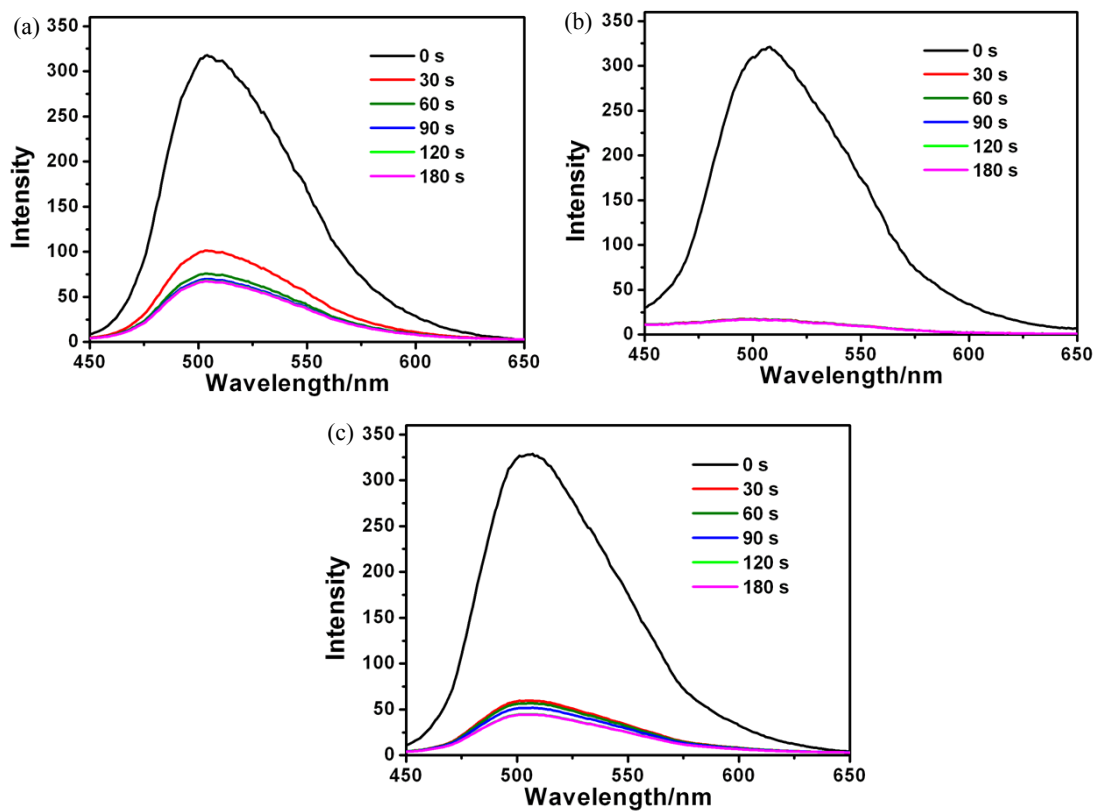

12. **Fig. S16** Fluorescence quench response of **4** upon exposure to NB (a), 2-NT (b) and 3-NT (c) vapour at the specified exposure times.

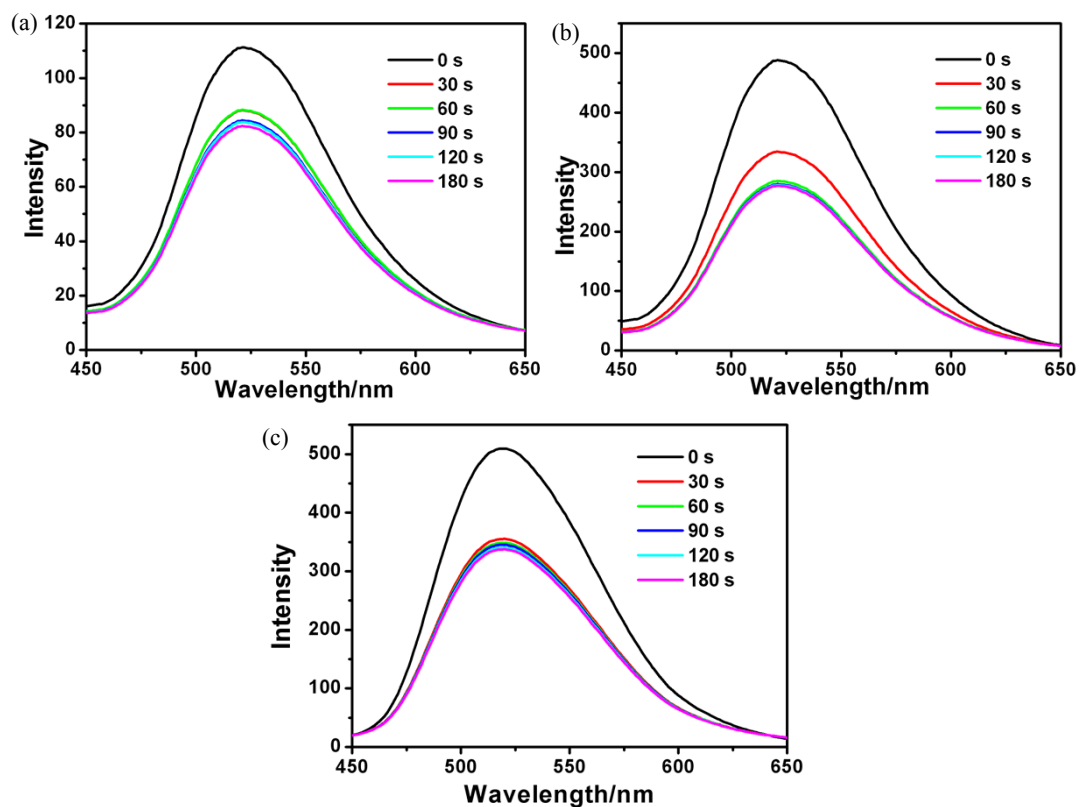

13. **Fig. S17** Fluorescence quench response of **5** upon exposure to NB (a), 2-NT (b) and 3-NT (c) vapour at the specified exposure times.

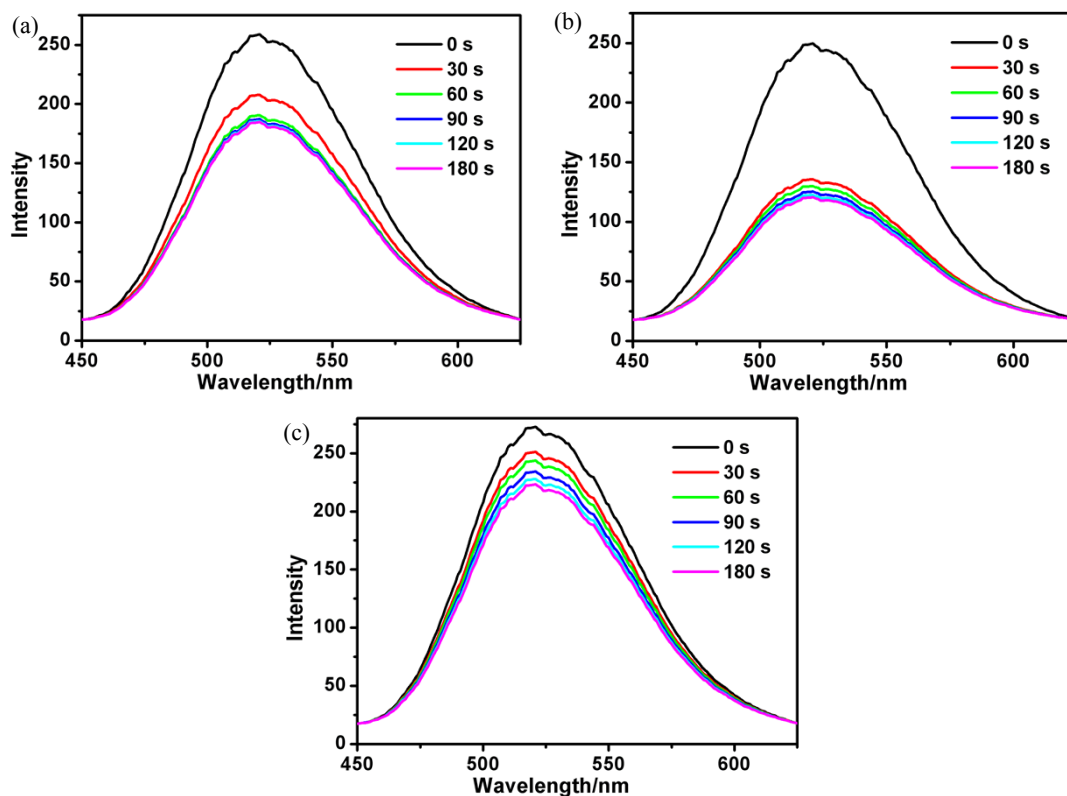

Supplement: c4dt02897j1.pdf [file c4dt02897j1.pdf]
